# Supplementary material for: Chemically derived defects in zinc oxide nanocrystals and their enhanced photo-electrocatalytic activities
Source: Royal Society of Chemistry journal article supplement (doi:10.1039/c4cp03583f), 2014-01-01
Supplement: c4cp03583f1.pdf [file c4cp03583f1.pdf]

## Electronic Supplementary Information

### Chemically derived defects in ZnO synthesized in different organic solvents and their photocatalytic activities

Anand Prakash and D. Bahadur\*

Department of Metallurgical Engineering and Materials Science,  
Indian Institute of Technology Bombay

Mumbai -400 076, India

\*Email address: dhiren@iitb.ac.in

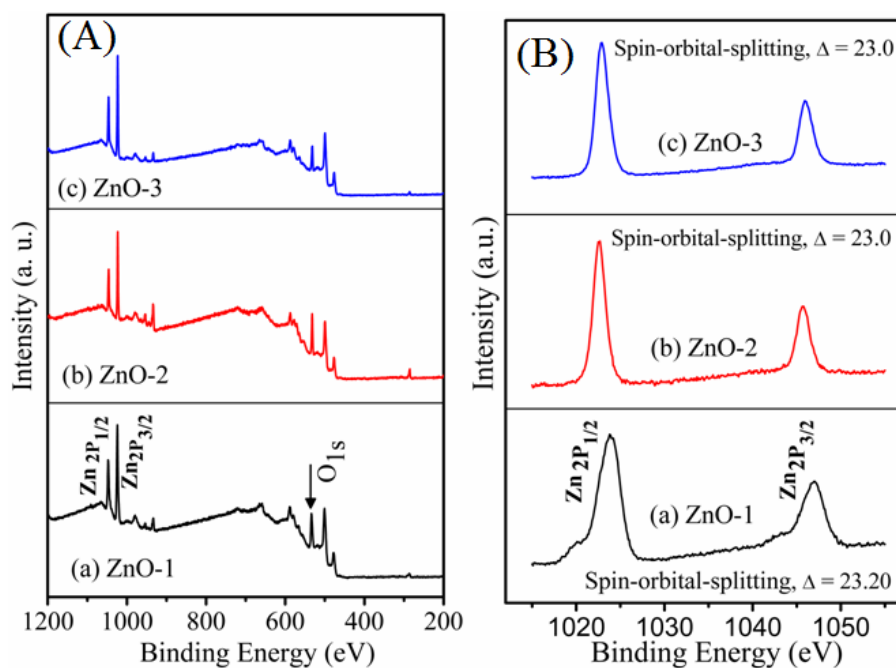

Figure S1. (A) X-ray photoelectron survey spectrum of the different ZnO NCs where main photoelectron peaks can be assigned to Zn2p and O1s derived bands. (B) Zn2p doublet spectral lines of ZnO-1, ZnO-2 and ZnO-3.

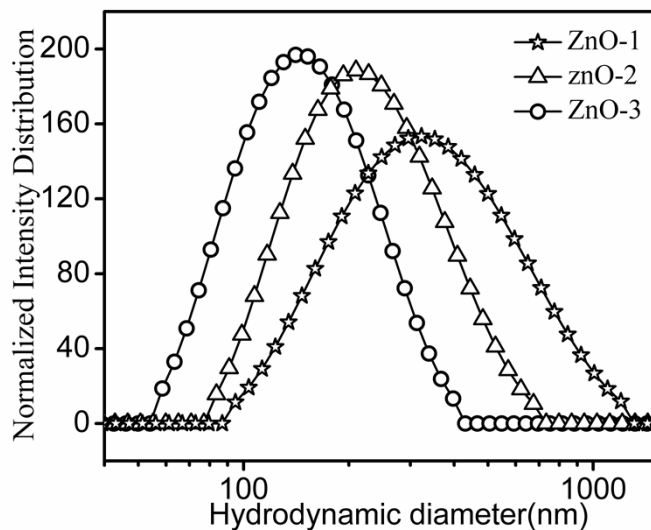

Figure S2. Hydrodynamic diameter (nm) of ZnO-1, ZnO-2 and ZnO-3 NCs.

The hydrodynamic diameter ( $H_D$ ) of ZnO NCs are exhibited in Figure S2. The  $H_D$  of ZnO-1, ZnO-2 and ZnO-3 are 350, 200 and 100 nm respectively and follow the same order as exhibited in their respective TEM microstructures.

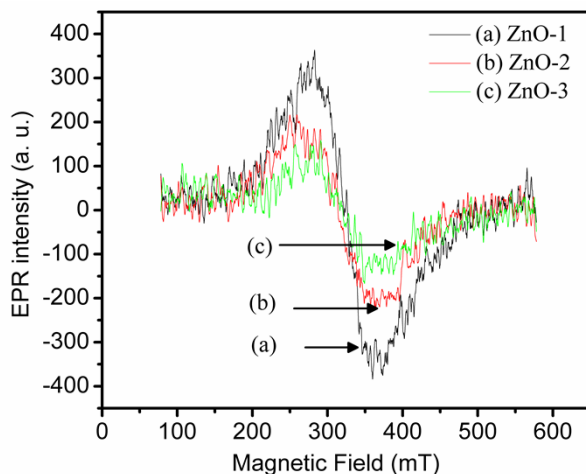

Figure S3. EPR spectra of (a) ZnO-1, (b) ZnO-2 and (c) ZnO-3 NCs.

To confirm our hypothesis of ZnO-1 having highest SDs as discussed in PL spectra (Figure 9), Electron Paramagnetic Resonance (EPR) spectra of samples have been recorded and investigated. The EPR is widely accepted as a very sensitive local probe to detect paramagnetic defects/centers in pristine ZnO. For comparison, the measurements were done at same parameters having equal weight of samples. Figures S3 depict the EPR spectra of ZnO-1, ZnO-2 and ZnO-3 measured at the X band (8.75-9.65 GHz). A strong EPR signal at  $\sim 338.7$  mT appears in all ZnO samples (Figure S3). This suggests that these NCs possess the same types of paramagnetic defects due to singly charged oxygen vacancies with unpaired electrons ( $V_{OS}^+$ ) available at the surface of ZnO<sup>1,2</sup>. It has been observed that g values of all ZnO NCs are same whereas the intensity of the signal at  $g \sim 1.9929$  in ZnO-1 is considerably suppressed as compared to ZnO-3. Here, the intensity of EPR signals of ZnO NCs at  $g \sim 1.9929$  follows almost the same trend as that of visible emission in the PL spectra (Figure 9).

## References

1. A. Prakash, S. K. Misra and D. Bahadur, *Nanotechnology*, 2013, 24, 095705.
2. B. Panigrahy, M. Aslam, D. S. Misra, M. Ghosh and D. Bahadur, *Adv. Funct. Mater.*, 2010, 20, 1161-1165.
